# Supplementary material for: Training with brain-machine interfaces, visuo-tactile feedback and assisted locomotion improves sensorimotor, visceral, and psychological signs in chronic paraplegic patients
Source: PubMed Central journal article supplement (PMC6264837; doi:10.1371/journal.pone.0206464), 2018-11-29
Supplement: pone.0206464.s001.pdf [file pone.0206464.s001.pdf]

**P1**

| Onset        | Pin prick(PP) |           |
|--------------|---------------|-----------|
|              | R             | L         |
| C2           | 2             | 2         |
| C3           | 2             | 2         |
| C4           | 2             | 2         |
| C5           | 2             | 2         |
| C6           | 2             | 2         |
| C7           | 2             | 2         |
| C8           | 2             | 2         |
| T1           | 2             | 2         |
| T2           | 2             | 2         |
| T3           | 2             | 2         |
| T4           | 2             | 2         |
| T5           | 2             | 2         |
| T6           | 2             | 2         |
| T7           | 2             | 2         |
| T8           | 2             | 2         |
| T9           | 2             | 2         |
| T10          | 2             | 2         |
| T11          | 2             | 2         |
| T12          | 1             | 0         |
| L1           | 0             | 0         |
| L2           | 0             | 0         |
| L3           | 0             | 0         |
| L4           | 0             | 0         |
| L5           | 0             | 0         |
| S1           | 0             | 0         |
| S2           | 0             | 0         |
| S3           | 0             | 0         |
| S4-S5        | 0             | 0         |
| <b>Total</b> | <b>37</b>     | <b>36</b> |

| Light touch (LT) |           |
|------------------|-----------|
| R                | L         |
| 2                | 2         |
| 2                | 2         |
| 2                | 2         |
| 2                | 2         |
| 2                | 2         |
| 2                | 2         |
| 2                | 2         |
| 2                | 2         |
| 2                | 2         |
| 2                | 2         |
| 2                | 2         |
| 2                | 2         |
| 2                | 2         |
| 2                | 2         |
| 2                | 2         |
| 2                | 2         |
| 2                | 2         |
| 2                | 2         |
| 2                | 2         |
| 2                | 2         |
| 2                | 2         |
| 2                | 2         |
| 2                | 2         |
| 2                | 2         |
| 1                | 0         |
| 0                | 0         |
| 0                | 0         |
| 0                | 0         |
| 0                | 0         |
| 0                | 0         |
| 0                | 0         |
| 0                | 0         |
| 0                | 0         |
| 0                | 0         |
| 0                | 0         |
| <b>37</b>        | <b>35</b> |

| Motor                 |    |           |           |
|-----------------------|----|-----------|-----------|
|                       |    | Right     | Left      |
| Elbow Flexor          | C5 | 5         | 5         |
| Wrist extensor        | C6 | 5         | 5         |
| Elbow extensor        | C7 | 5         | 5         |
| Finger flexor         | C8 | 5         | 5         |
| Finger abductors      | T1 | 5         | 5         |
| Hip flexors           | L2 | 0         | 0         |
| Knee exntensors       | L3 | 0         | 0         |
| Ankle dorsiflexors    | L4 | 0         | 0         |
| Long toes extensors   | L5 | 0         | 0         |
| Ankle plantar flexors | S1 | 0         | 0         |
| <b>Total</b>          |    | <b>25</b> | <b>25</b> |

(VAC) Voluntary anal contraction (yes/no)  No

Deep Anal Pressure  No

| Motor score |    |          |
|-------------|----|----------|
| UER         | 25 | Max (25) |
| UEL         | 25 | (25)     |
| UEMS TOTAL  | 50 | (50)     |

| Sensory Subscores |   |          |
|-------------------|---|----------|
| LER               | 0 | Max (25) |
| LEL               | 0 | (25)     |
| TOTAL LEMS        | 0 | (50)     |

| Sensory Subscores |    |          |
|-------------------|----|----------|
| RLT               | 37 | MAX (56) |
| LLT               | 35 | (56)     |
| LT TOTAL          | 72 | (112)    |

| PP Total |    |          |
|----------|----|----------|
| RPP      | 37 | MAX (56) |
| LPP      | 36 | (56)     |
| PP TOTAL | 73 | (112)    |

NEUROLOGICAL LEVELS

|         | R   | L   |
|---------|-----|-----|
| Sensory | T11 | T10 |
| Motor   | T11 | T10 |

Complete or incomplete  C

Impairment scale

A

Neurological level of injury (NLI)

**T10**

Zone of partial preservation

|         | R   | L   |
|---------|-----|-----|
| Sensory | T11 | T10 |
| Motor   | T11 | T10 |

| End          | Pin prick(PP) |           |
|--------------|---------------|-----------|
|              | R             | L         |
| C2           | 2             | 2         |
| C3           | 2             | 2         |
| C4           | 2             | 2         |
| C5           | 2             | 2         |
| C6           | 2             | 2         |
| C7           | 2             | 2         |
| C8           | 2             | 2         |
| T1           | 2             | 2         |
| T2           | 2             | 2         |
| T3           | 2             | 2         |
| T4           | 2             | 2         |
| T5           | 2             | 2         |
| T6           | 2             | 2         |
| T7           | 2             | 2         |
| T8           | 2             | 2         |
| T9           | 2             | 2         |
| T10          | 2             | 2         |
| T11          | 2             | 2         |
| T12          | 2             | 2         |
| L1           | 2             | 1         |
| L2           | 1             | 1         |
| L3           | 0             | 0         |
| L4           | 0             | 0         |
| L5           | 0             | 0         |
| S1           | 0             | 0         |
| S2           | 0             | 0         |
| S3           | 0             | 0         |
| S4-S5        | 1             | 1         |
| <b>Total</b> | <b>42</b>     | <b>41</b> |

NEUROLOGICAL LEVELS

|         | R   | L   |
|---------|-----|-----|
| Sensory | L1  | T12 |
| Motor   | T12 | T12 |

Complete or incomplete  I

Impairment scale

C

| Light touch (LT) |           |
|------------------|-----------|
| R                | L         |
| 2                | 2         |
| 2                | 2         |
| 2                | 2         |
| 2                | 2         |
| 2                | 2         |
| 2                | 2         |
| 2                | 2         |
| 2                | 2         |
| 2                | 2         |
| 2                | 2         |
| 2                | 2         |
| 2                | 2         |
| 2                | 2         |
| 2                | 2         |
| 2                | 2         |
| 2                | 2         |
| 2                | 2         |
| 2                | 2         |
| 2                | 2         |
| 2                | 2         |
| 2                | 2         |
| 2                | 2         |
| 2                | 2         |
| 2                | 2         |
| 2                | 2         |
| 2                | 2         |
| 2                | 2         |
| 2                | 2         |
| 2                | 2         |
| 2                | 2         |
| 2                | 2         |
| 2                | 2         |
| 2                | 2         |
| 2                | 2         |
| 2                | 2         |
| 2                | 2         |
| 2                | 2         |
| 2                | 2         |
| 2                | 2         |
| 2                | 2         |
| 2                | 2         |
| 1                | 1         |
| 0                | 0         |
| 0                | 0         |
| 0                | 0         |
| 0                | 0         |
| 0                | 0         |
| 0                | 0         |
| 0                | 0         |
| 0                | 0         |
| 0                | 0         |
| 0                | 0         |
| 0                | 0         |
| 0                | 0         |
| 0                | 0         |
| <b>41</b>        | <b>40</b> |

Neurological level of injury (NLI)

**T12**

Zone of partial preservation

|         | R | L |
|---------|---|---|
| Sensory |   |   |
| Motor   |   |   |

| Motor                 |    |           |           |
|-----------------------|----|-----------|-----------|
|                       |    | Right     | Left      |
| Elbow Flexor          | C5 | 5         | 5         |
| Wrist extensor        | C6 | 5         | 5         |
| Elbow extensor        | C7 | 5         | 5         |
| Finger flexor         | C8 | 5         | 5         |
| Finger abductors      | T1 | 5         | 5         |
| Hip flexors           | L2 | 2         | 2         |
| Knee exntensors       | L3 | 2         | 2         |
| Ankle dorsiflexors    | L4 | 1         | 1         |
| Long toes extensors   | L5 | 0         | 0         |
| Ankle plantar flexors | S1 | 0         | 0         |
| <b>Total</b>          |    | <b>30</b> | <b>30</b> |

(VAC) Voluntary anal contraction (yes/no)  Yes

Deep Anal Pressure  Yes

| Motor score |    |          |
|-------------|----|----------|
| UER         | 25 | Max (25) |
| UEL         | 25 | (25)     |
| UEMS TOTAL  | 50 | (50)     |

| Sensory Subscores |    |          |
|-------------------|----|----------|
| LER               | 5  | Max (25) |
| LEL               | 5  | (25)     |
| TOTAL LEMS        | 10 | (50)     |

| Sensory Subscores |    |          |
|-------------------|----|----------|
| RLT               | 41 | MAX (56) |
| LLT               | 40 | (56)     |
| LT TOTAL          | 81 | (112)    |

| PP Total |    |          |
|----------|----|----------|
| RPP      | 42 | MAX (56) |
| LPP      | 41 | (56)     |
| PP TOTAL | 83 | (112)    |

**P2**

| Onset | Pin prick(PP) |    |
|-------|---------------|----|
|       | R             | L  |
| C2    | 2             | 2  |
| C3    | 2             | 2  |
| C4    | 2             | 2  |
| C5    | 2             | 2  |
| C6    | 2             | 2  |
| C7    | 2             | 2  |
| C8    | 2             | 2  |
| T1    | 2             | 2  |
| T2    | 2             | 2  |
| T3    | 2             | 2  |
| T4    | 2             | 2  |
| T5    | 1             | 1  |
| T6    | 1             | 1  |
| T7    | 1             | 1  |
| T8    | 1             | 1  |
| T9    | 1             | 1  |
| T10   | 1             | 1  |
| T11   | 1             | 1  |
| T12   | 1             | 1  |
| L1    | 1             | 1  |
| L2    | 1             | 1  |
| L3    | 1             | 1  |
| L4    | 1             | 1  |
| L5    | 1             | 1  |
| S1    | 1             | 1  |
| S2    | 1             | 1  |
| S3    | 1             | 1  |
| S4-S5 | 1             | 1  |
| Total | 39            | 39 |

| Light touch (LT) | R  | L |
|------------------|----|---|
|                  | 2  | 2 |
| 2                | 2  |   |
| 2                | 2  |   |
| 2                | 2  |   |
| 2                | 2  |   |
| 2                | 2  |   |
| 2                | 2  |   |
| 2                | 2  |   |
| 2                | 2  |   |
| 2                | 2  |   |
| 2                | 2  |   |
| 2                | 2  |   |
| 2                | 2  |   |
| 2                | 2  |   |
| 2                | 2  |   |
| 2                | 2  |   |
| 2                | 2  |   |
| 1                | 1  |   |
| 1                | 1  |   |
| 1                | 1  |   |
| 1                | 1  |   |
| 1                | 1  |   |
| 1                | 1  |   |
| 1                | 1  |   |
| 1                | 1  |   |
| 1                | 1  |   |
| 1                | 1  |   |
| 1                | 1  |   |
| 1                | 1  |   |
| 1                | 1  |   |
| 1                | 1  |   |
| 1                | 1  |   |
| 1                | 1  |   |
| 1                | 1  |   |
| 1                | 1  |   |
| 39               | 39 |   |

| Motor                 |    |       |      |
|-----------------------|----|-------|------|
|                       |    | Right | Left |
| Elbow Flexor          | C5 | 5     | 5    |
| Wrist extensor        | C6 | 5     | 5    |
| Elbow extensor        | C7 | 5     | 5    |
| Finger flexor         | C8 | 5     | 5    |
| Finger abductors      | T1 | 5     | 5    |
| Hip flexors           | L2 | 0     | 0    |
| Knee extensors        | L3 | 0     | 0    |
| Ankle dorsiflexors    | L4 | 0     | 0    |
| Long toes extensors   | L5 | 0     | 0    |
| Ankle plantar flexors | S1 | 0     | 0    |
| Total                 |    | 25    | 25   |

(VAC) Voluntary anal contraction (yes/no)  No

Deep Anal Pressure  Yes

Motor score

|            |    |          |
|------------|----|----------|
| UER        | 25 | Max (25) |
| UEL        | 25 | (25)     |
| UEMS TOTAL | 50 | (50)     |

|            |   |          |
|------------|---|----------|
| LER        | 0 | Max (25) |
| LEL        | 0 | (25)     |
| TOTAL LEMS | 0 | (50)     |

Sensory Subscores

|          |    |          |
|----------|----|----------|
| RLT      | 39 | MAX (56) |
| LLT      | 39 | (56)     |
| LT TOTAL | 78 | (112)    |

|          |    |          |
|----------|----|----------|
| RPP      | 39 | MAX (56) |
| LPP      | 39 | (56)     |
| PP TOTAL | 78 | (112)    |

NEUROLOGICAL LEVELS

|         | R  | L  |
|---------|----|----|
| Sensory | T4 | T4 |
| Motor   | T4 | T4 |

Neurological level of injury (NLI)  
**T4**

Complete or incomplete  
I

Impairment scale  
B

Zone of partial preservation

|         | R | L |
|---------|---|---|
| Sensory |   |   |
| Motor   |   |   |

| End   | Pin prick(PP) |    |
|-------|---------------|----|
|       | R             | L  |
| C2    | 2             | 2  |
| C3    | 2             | 2  |
| C4    | 2             | 2  |
| C5    | 2             | 2  |
| C6    | 2             | 2  |
| C7    | 2             | 2  |
| C8    | 2             | 2  |
| T1    | 2             | 2  |
| T2    | 2             | 2  |
| T3    | 2             | 2  |
| T4    | 2             | 2  |
| T5    | 2             | 2  |
| T6    | 1             | 1  |
| T7    | 1             | 1  |
| T8    | 1             | 1  |
| T9    | 1             | 1  |
| T10   | 1             | 1  |
| T11   | 1             | 1  |
| T12   | 1             | 1  |
| L1    | 1             | 1  |
| L2    | 1             | 1  |
| L3    | 1             | 1  |
| L4    | 1             | 1  |
| L5    | 1             | 1  |
| S1    | 1             | 1  |
| S2    | 1             | 1  |
| S3    | 1             | 1  |
| S4-S5 | 1             | 1  |
| Total | 40            | 40 |

| Light touch (LT) | R  | L |
|------------------|----|---|
|                  | 2  | 2 |
| 2                | 2  |   |
| 2                | 2  |   |
| 2                | 2  |   |
| 2                | 2  |   |
| 2                | 2  |   |
| 2                | 2  |   |
| 2                | 2  |   |
| 2                | 2  |   |
| 2                | 2  |   |
| 2                | 2  |   |
| 2                | 2  |   |
| 2                | 2  |   |
| 2                | 2  |   |
| 2                | 2  |   |
| 2                | 2  |   |
| 2                | 2  |   |
| 2                | 2  |   |
| 2                | 2  |   |
| 2                | 2  |   |
| 2                | 2  |   |
| 1                | 1  |   |
| 1                | 1  |   |
| 1                | 1  |   |
| 1                | 1  |   |
| 1                | 1  |   |
| 1                | 1  |   |
| 1                | 1  |   |
| 1                | 1  |   |
| 1                | 1  |   |
| 1                | 1  |   |
| 1                | 1  |   |
| 1                | 1  |   |
| 40               | 40 |   |

NEUROLOGICAL LEVELS

|         | R  | L  |
|---------|----|----|
| Sensory | T5 | T5 |
| Motor   | T5 | T5 |

Neurological level of injury (NLI)  
**T5**

Complete or incomplete  
I

Impairment scale  
C

Zone of partial preservation

|         | R | L |
|---------|---|---|
| Sensory |   |   |
| Motor   |   |   |

| Motor                 |    |       |      |
|-----------------------|----|-------|------|
|                       |    | Right | Left |
| Elbow Flexor          | C5 | 5     | 5    |
| Wrist extensor        | C6 | 5     | 5    |
| Elbow extensor        | C7 | 5     | 5    |
| Finger flexor         | C8 | 5     | 5    |
| Finger abductors      | T1 | 5     | 5    |
| Hip flexors           | L2 | 1     | 1    |
| Knee extensors        | L3 | 1     | 1    |
| Ankle dorsiflexors    | L4 | 0     | 0    |
| Long toes extensors   | L5 | 0     | 0    |
| Ankle plantar flexors | S1 | 0     | 0    |
| Total                 |    | 27    | 27   |

(VAC) Voluntary anal contraction (yes/no)  Yes

Deep Anal Pressure  Yes

Motor score

|            |    |          |
|------------|----|----------|
| UER        | 25 | Max (25) |
| UEL        | 25 | (25)     |
| UEMS TOTAL | 50 | (50)     |

|            |   |          |
|------------|---|----------|
| LER        | 2 | Max (25) |
| LEL        | 2 | (25)     |
| TOTAL LEMS | 4 | (50)     |

Sensory Subscores

|          |    |          |
|----------|----|----------|
| RLT      | 40 | MAX (56) |
| LLT      | 40 | (56)     |
| LT TOTAL | 80 | (112)    |

|          |    |          |
|----------|----|----------|
| RPP      | 40 | MAX (56) |
| LPP      | 40 | (56)     |
| PP TOTAL | 80 | (112)    |



P4

| Onset        | Pin prick(PP) |           |
|--------------|---------------|-----------|
|              | R             | L         |
| C2           | 2             | 2         |
| C3           | 2             | 2         |
| C4           | 2             | 2         |
| C5           | 2             | 2         |
| C6           | 2             | 2         |
| C7           | 2             | 2         |
| C8           | 2             | 2         |
| T1           | 2             | 2         |
| T2           | 2             | 2         |
| T3           | 2             | 2         |
| T4           | 2             | 2         |
| T5           | 2             | 2         |
| T6           | 2             | 2         |
| T7           | 2             | 2         |
| T8           | 2             | 2         |
| T9           | 1             | 1         |
| T10          | 1             | 1         |
| T11          | 0             | 0         |
| T12          | 0             | 0         |
| L1           | 0             | 0         |
| L2           | 0             | 0         |
| L3           | 0             | 0         |
| L4           | 0             | 0         |
| L5           | 0             | 0         |
| S1           | 0             | 0         |
| S2           | 0             | 0         |
| S3           | 0             | 0         |
| S4-S5        | 0             | 0         |
| <b>Total</b> | <b>32</b>     | <b>32</b> |

| Light touch (LT) |           |
|------------------|-----------|
| R                | L         |
| 2                | 2         |
| 2                | 2         |
| 2                | 2         |
| 2                | 2         |
| 2                | 2         |
| 2                | 2         |
| 2                | 2         |
| 2                | 2         |
| 2                | 2         |
| 2                | 2         |
| 2                | 2         |
| 2                | 2         |
| 2                | 2         |
| 2                | 2         |
| 1                | 1         |
| 1                | 1         |
| 0                | 0         |
| 0                | 0         |
| 0                | 0         |
| 0                | 0         |
| 0                | 0         |
| 0                | 0         |
| 0                | 0         |
| 0                | 0         |
| 0                | 0         |
| 0                | 0         |
| 0                | 0         |
| 0                | 0         |
| 0                | 0         |
| <b>Total</b>     | <b>32</b> |

| Motor                 |    |           |           |
|-----------------------|----|-----------|-----------|
|                       |    | Right     | Left      |
| Elbow Flexor          | C5 | 5         | 5         |
| Wrist extensor        | C6 | 5         | 5         |
| Elbow extensor        | C7 | 5         | 5         |
| Finger flexor         | C8 | 5         | 5         |
| Finger abductors      | T1 | 5         | 5         |
| Hip flexors           | L2 | 0         | 0         |
| Knee exntensors       | L3 | 0         | 0         |
| Ankle dorsiflexors    | L4 | 0         | 0         |
| Long toes extensors   | L5 | 0         | 0         |
| Ankle plantar flexors | S1 | 0         | 0         |
| <b>Total</b>          |    | <b>25</b> | <b>25</b> |

(VAC) Voluntary anal contraction (yes/no)  No

Deep Anal Pressure  No

| Motor score       |           |             |
|-------------------|-----------|-------------|
| UER               | 25        | Max (25)    |
| UEL               | 25        | (25)        |
| <b>UEMS TOTAL</b> | <b>50</b> | <b>(50)</b> |

|                   |          |             |
|-------------------|----------|-------------|
| LER               | 0        | Max (25)    |
| LEL               | 0        | (25)        |
| <b>TOTAL LEMS</b> | <b>0</b> | <b>(50)</b> |

| Sensory Subscores |           |              |
|-------------------|-----------|--------------|
| RLT               | 32        | MAX (56)     |
| LLT               | 32        | (56)         |
| <b>LT TOTAL</b>   | <b>64</b> | <b>(112)</b> |

|                 |           |              |
|-----------------|-----------|--------------|
| RPP             | 32        | MAX (56)     |
| LPP             | 32        | (56)         |
| <b>PP TOTAL</b> | <b>64</b> | <b>(112)</b> |

NEUROLOGICAL LEVELS

|         | R  | L  |
|---------|----|----|
| Sensory | T8 | T8 |
| Motor   | T8 | T8 |

Complete or incomplete

C

Impairment scale

A

Neurological level of injury (NLI)

Zone of partial preservation

|         | R   | L   |
|---------|-----|-----|
| Sensory | T10 | T10 |
| Motor   | T10 | T10 |

| End          | Pin prick(PP) |           |
|--------------|---------------|-----------|
|              | R             | L         |
| C2           | 2             | 2         |
| C3           | 2             | 2         |
| C4           | 2             | 2         |
| C5           | 2             | 2         |
| C6           | 2             | 2         |
| C7           | 2             | 2         |
| C8           | 2             | 2         |
| T1           | 2             | 2         |
| T2           | 2             | 2         |
| T3           | 2             | 2         |
| T4           | 2             | 2         |
| T5           | 2             | 2         |
| T6           | 2             | 2         |
| T7           | 2             | 2         |
| T8           | 2             | 2         |
| T9           | 1             | 2         |
| T10          | 1             | 1         |
| T11          | 1             | 1         |
| T12          | 1             | 1         |
| L1           | 1             | 1         |
| L2           | 0             | 1         |
| L3           | 1             | 1         |
| L4           | 1             | 1         |
| L5           | 1             | 1         |
| S1           | 1             | 1         |
| S2           | 0             | 0         |
| S3           | 0             | 0         |
| S4-S5        | 1             | 1         |
| <b>Total</b> | <b>40</b>     | <b>42</b> |

NEUROLOGICAL LEVELS

|         | R  | L  |
|---------|----|----|
| Sensory | T8 | T9 |
| Motor   | T8 | T9 |

Complete or incomplete

I

Impairment scale

C

| Light touch (LT) |           |
|------------------|-----------|
| R                | L         |
| 2                | 2         |
| 2                | 2         |
| 2                | 2         |
| 2                | 2         |
| 2                | 2         |
| 2                | 2         |
| 2                | 2         |
| 2                | 2         |
| 2                | 2         |
| 2                | 2         |
| 2                | 2         |
| 2                | 2         |
| 2                | 2         |
| 2                | 2         |
| 1                | 2         |
| 1                | 1         |
| 1                | 1         |
| 1                | 1         |
| 0                | 0         |
| 0                | 0         |
| 0                | 0         |
| 1                | 1         |
| 1                | 1         |
| 0                | 0         |
| 0                | 0         |
| 0                | 0         |
| 0                | 0         |
| <b>Total</b>     | <b>37</b> |

Neurological level of injury (NLI)

Zone of partial preservation

|         | R | L |
|---------|---|---|
| Sensory |   |   |
| Motor   |   |   |

| Motor                 |    |           |           |
|-----------------------|----|-----------|-----------|
|                       |    | Right     | Left      |
| Elbow Flexor          | C5 | 5         | 5         |
| Wrist extensor        | C6 | 5         | 5         |
| Elbow extensor        | C7 | 5         | 5         |
| Finger flexor         | C8 | 5         | 5         |
| Finger abductors      | T1 | 5         | 5         |
| Hip flexors           | L2 | 1         | 1         |
| Knee exntensors       | L3 | 1         | 1         |
| Ankle dorsiflexors    | L4 | 1         | 0         |
| Long toes extensors   | L5 | 0         | 0         |
| Ankle plantar flexors | S1 | 1         | 0         |
| <b>Total</b>          |    | <b>29</b> | <b>27</b> |

(VAC) Voluntary anal contraction (yes/no)  Yes

Deep Anal Pressure  Yes

| Motor score       |           |             |
|-------------------|-----------|-------------|
| UER               | 25        | Max (25)    |
| UEL               | 25        | (25)        |
| <b>UEMS TOTAL</b> | <b>50</b> | <b>(50)</b> |

|                   |          |             |
|-------------------|----------|-------------|
| LER               | 4        | Max (25)    |
| LEL               | 2        | (25)        |
| <b>TOTAL LEMS</b> | <b>6</b> | <b>(50)</b> |

| Sensory Subscores |           |              |
|-------------------|-----------|--------------|
| RLT               | 37        | MAX (56)     |
| LLT               | 38        | (56)         |
| <b>LT TOTAL</b>   | <b>75</b> | <b>(112)</b> |

|                 |           |              |
|-----------------|-----------|--------------|
| RPP             | 40        | MAX (56)     |
| LPP             | 42        | (56)         |
| <b>PP TOTAL</b> | <b>82</b> | <b>(112)</b> |







**P8**

| Onset            |     | Pin prick(PP)          |         | Light touch (LT)                   |     | Motor                                                                 |       |          |    |
|------------------|-----|------------------------|---------|------------------------------------|-----|-----------------------------------------------------------------------|-------|----------|----|
|                  |     | R                      | L       |                                    |     |                                                                       | Right | Left     |    |
| C2               | 2   | 2                      | 2       | 2                                  | 2   | Elbow Flexor                                                          | C5    | 5        | 5  |
| C3               | 2   | 2                      | 2       | 2                                  | 2   | Wrist extensor                                                        | C6    | 5        | 5  |
| C4               | 2   | 2                      | 2       | 2                                  | 2   | Elbow extensor                                                        | C7    | 5        | 5  |
| C5               | 2   | 2                      | 2       | 2                                  | 2   | Finger flexor                                                         | C8    | 5        | 5  |
| C6               | 2   | 2                      | 2       | 2                                  | 2   | Finger abductors                                                      | T1    | 5        | 5  |
| C7               | 2   | 2                      | 2       | 2                                  | 2   | Hip flexors                                                           | L2    | 0        | 0  |
| C8               | 2   | 2                      | 2       | 2                                  | 2   | Knee extensors                                                        | L3    | 0        | 0  |
| T1               | 2   | 2                      | 2       | 2                                  | 2   | Ankle dorsiflexors                                                    | L4    | 0        | 0  |
| T2               | 2   | 2                      | 2       | 2                                  | 2   | Long toes extensors                                                   | L5    | 0        | 0  |
| T3               | 2   | 2                      | 2       | 2                                  | 2   | Ankle plantar flexors                                                 | S1    | 0        | 0  |
| T4               | 2   | 2                      | 2       | 2                                  | 2   | Total                                                                 |       | 25       | 25 |
| T5               | 2   | 2                      | 2       | 2                                  | 2   | (VAC) Voluntary anal contraction (yes/no) <input type="checkbox"/> No |       |          |    |
| T6               | 2   | 2                      | 2       | 2                                  | 2   | Deep Anal Pressure <input type="checkbox"/> No                        |       |          |    |
| T7               | 2   | 2                      | 2       | 2                                  | 2   | Motor score                                                           |       |          |    |
| T8               | 2   | 2                      | 2       | 2                                  | 2   | UER                                                                   | 25    | Max (25) |    |
| T9               | 2   | 2                      | 2       | 2                                  | 2   | UEL                                                                   | 25    | (25)     |    |
| T10              | 2   | 2                      | 2       | 2                                  | 2   | UEMS TOTAL                                                            | 50    | (50)     |    |
| T11              | 2   | 2                      | 2       | 2                                  | 2   | LER                                                                   | 0     | Max (25) |    |
| T12              | 1   | 1                      | 1       | 1                                  | 1   | LEL                                                                   | 0     | (25)     |    |
| L1               | 0   | 0                      | 0       | 0                                  | 0   | TOTAL LEMS                                                            | 0     | (50)     |    |
| L2               | 0   | 0                      | 0       | 0                                  | 0   | Sensory Subscores                                                     |       |          |    |
| L3               | 0   | 0                      | 0       | 0                                  | 0   | RLT                                                                   | 37    | MAX (56) |    |
| L4               | 0   | 0                      | 0       | 0                                  | 0   | LLT                                                                   | 37    | (56)     |    |
| L5               | 0   | 0                      | 0       | 0                                  | 0   | LT TOTAL                                                              | 74    | (112)    |    |
| S1               | 0   | 0                      | 0       | 0                                  | 0   | RPP                                                                   | 37    | MAX (56) |    |
| S2               | 0   | 0                      | 0       | 0                                  | 0   | LPP                                                                   | 37    | (56)     |    |
| S3               | 0   | 0                      | 0       | 0                                  | 0   | PP TOTAL                                                              | 74    | (112)    |    |
| S4-S5            | 0   | 0                      | 0       | 0                                  | 0   | NEUROLOGICAL LEVELS                                                   |       |          |    |
|                  |     | R                      | L       | Neurological level of injury (NLI) |     |                                                                       |       |          |    |
| Sensory          | T11 | T11                    | T11     | T11                                |     |                                                                       |       |          |    |
| Motor            | T11 | T11                    | T11     | T11                                |     |                                                                       |       |          |    |
|                  |     | Complete or incomplete |         | Zone of partial preservation       |     |                                                                       |       |          |    |
| C                |     |                        | R       | L                                  |     |                                                                       |       |          |    |
| Impairment scale |     |                        | Sensory | T12                                | T12 |                                                                       |       |          |    |
| A                |     |                        | Motor   | T12                                | T12 |                                                                       |       |          |    |

  

| End              |     | Pin prick(PP)          |         | Light touch (LT)                   |   | Motor                                                                  |       |          |    |
|------------------|-----|------------------------|---------|------------------------------------|---|------------------------------------------------------------------------|-------|----------|----|
|                  |     | R                      | L       |                                    |   |                                                                        | Right | Left     |    |
| C2               | 2   | 2                      | 2       | 2                                  | 2 | Elbow Flexor                                                           | C5    | 5        | 5  |
| C3               | 2   | 2                      | 2       | 2                                  | 2 | Wrist extensor                                                         | C6    | 5        | 5  |
| C4               | 2   | 2                      | 2       | 2                                  | 2 | Elbow extensor                                                         | C7    | 5        | 5  |
| C5               | 2   | 2                      | 2       | 2                                  | 2 | Finger flexor                                                          | C8    | 5        | 5  |
| C6               | 2   | 2                      | 2       | 2                                  | 2 | Finger abductors                                                       | T1    | 5        | 5  |
| C7               | 2   | 2                      | 2       | 2                                  | 2 | Hip flexors                                                            | L2    | 2        | 2  |
| C8               | 2   | 2                      | 2       | 2                                  | 2 | Knee extensors                                                         | L3    | 2        | 2  |
| T1               | 2   | 2                      | 2       | 2                                  | 2 | Ankle dorsiflexors                                                     | L4    | 1        | 1  |
| T2               | 2   | 2                      | 2       | 2                                  | 2 | Long toes extensors                                                    | L5    | 0        | 0  |
| T3               | 2   | 2                      | 2       | 2                                  | 2 | Ankle plantar flexors                                                  | S1    | 1        | 0  |
| T4               | 2   | 2                      | 2       | 2                                  | 2 | Total                                                                  |       | 31       | 30 |
| T5               | 2   | 2                      | 2       | 2                                  | 2 | (VAC) Voluntary anal contraction (yes/no) <input type="checkbox"/> Yes |       |          |    |
| T6               | 2   | 2                      | 2       | 2                                  | 2 | Deep Anal Pressure <input type="checkbox"/> Yes                        |       |          |    |
| T7               | 2   | 2                      | 2       | 2                                  | 2 | Motor score                                                            |       |          |    |
| T8               | 2   | 2                      | 2       | 2                                  | 2 | UER                                                                    | 25    | Max (25) |    |
| T9               | 2   | 2                      | 2       | 2                                  | 2 | UEL                                                                    | 25    | (25)     |    |
| T10              | 2   | 2                      | 2       | 2                                  | 2 | UEMS TOTAL                                                             | 50    | (50)     |    |
| T11              | 2   | 2                      | 2       | 2                                  | 2 | LER                                                                    | 6     | Max (25) |    |
| L1               | 1   | 1                      | 1       | 1                                  | 1 | LEL                                                                    | 5     | (25)     |    |
| L2               | 1   | 1                      | 1       | 1                                  | 0 | TOTAL LEMS                                                             | 11    | (50)     |    |
| L3               | 0   | 1                      | 1       | 0                                  | 0 | Sensory Subscores                                                      |       |          |    |
| L4               | 0   | 0                      | 0       | 0                                  | 0 | RLT                                                                    | 40    | MAX (56) |    |
| L5               | 0   | 0                      | 0       | 0                                  | 0 | LLT                                                                    | 42    | (56)     |    |
| S1               | 0   | 1                      | 1       | 1                                  | 1 | LT TOTAL                                                               | 82    | (112)    |    |
| S2               | 0   | 0                      | 0       | 0                                  | 0 | RPP                                                                    | 41    | MAX (56) |    |
| S3               | 1   | 1                      | 1       | 1                                  | 1 | LPP                                                                    | 43    | (56)     |    |
| S4-S5            | 1   | 1                      | 1       | 1                                  | 1 | PP TOTAL                                                               | 84    | (112)    |    |
|                  |     | R                      | L       | Neurological level of injury (NLI) |   |                                                                        |       |          |    |
| Sensory          | T11 | T11                    | T11     | T11                                |   |                                                                        |       |          |    |
| Motor            | T11 | T11                    | T11     | T11                                |   |                                                                        |       |          |    |
|                  |     | Complete or incomplete |         | Zone of partial preservation       |   |                                                                        |       |          |    |
| I                |     |                        | R       | L                                  |   |                                                                        |       |          |    |
| Impairment scale |     |                        | Sensory |                                    |   |                                                                        |       |          |    |
| C                |     |                        | Motor   |                                    |   |                                                                        |       |          |    |
