# Supplementary material for: Training with brain-machine interfaces, visuo-tactile feedback and assisted locomotion improves sensorimotor, visceral, and psychological signs in chronic paraplegic patients
Source: PubMed Central journal article supplement (PMC6264837; doi:10.1371/journal.pone.0206464), 2018-11-29

### A. Spinal cord MRI Sagittal plane

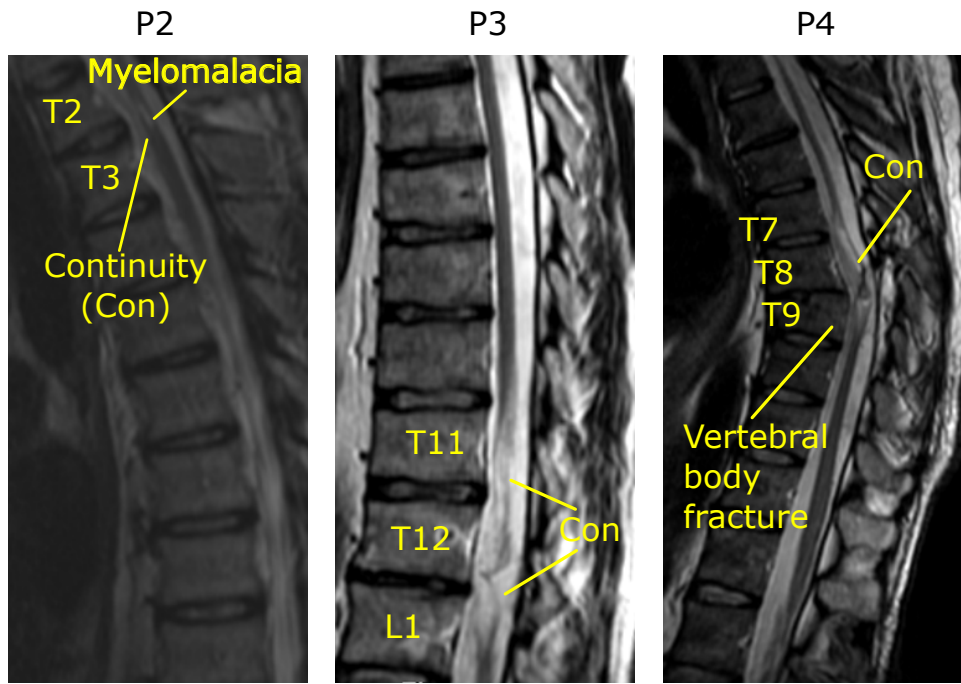

### C. Spinal cord 3D visualisation

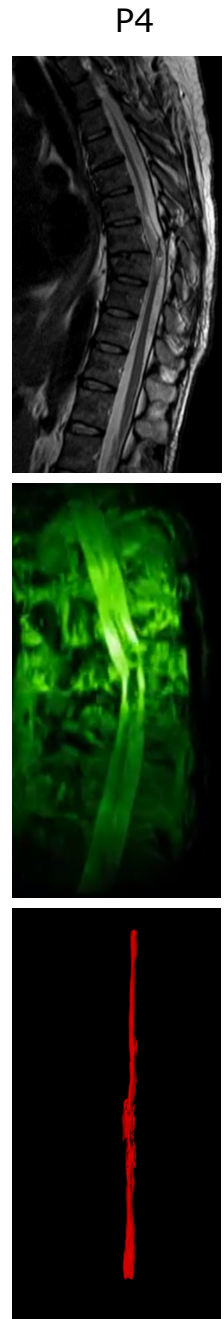

### B. Spinal cord MRI Axial plane

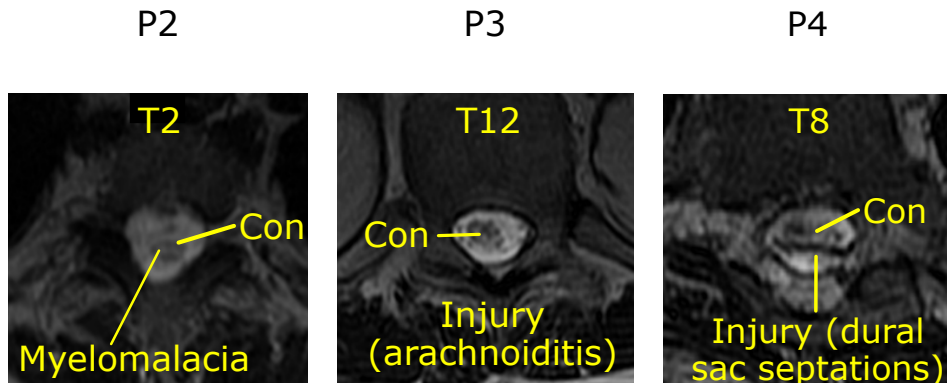

Supplement: pone.0206464.s002.pdf [file pone.0206464.s002.pdf]
